# Supplementary material for: Preparation of a nanostructured iron chromite spinel in the pure form and its catalytic activity for the selective oxidation of benzene to phenol: experimental and DFT studies
Source: Royal Society of Chemistry journal article supplement (doi:10.1039/d2gc02335k), 2022-01-01
Supplement: d2gc02335k1.pdf [file d2gc02335k1.pdf]

## Supporting Information

### **Preparation of nanostructured iron chromite spinel in the pure form and its catalytic activity for the selective oxidation of benzene to phenol: Experimental and DFT study**

Sonu Bhandari <sup>a, b</sup>, Rubina Khatun <sup>a, b</sup>, Tuhin Suvra Khan <sup>a, b</sup>, Deepak Khurana <sup>a, b</sup> Mukesh Kumar Poddar <sup>a</sup>, Astha Shukla <sup>a, b</sup>, V.V.D.N Prasad <sup>a, b</sup>, Rajaram Bal <sup>a, b, \*</sup>

<sup>a</sup> Light Stock Processing Division, CSIR-Indian Institute of Petroleum, Dehradun- 248005, Uttarakhand, India

<sup>b</sup> Academy of Scientific and Innovative Research (AcSIR), Ghaziabad- 201002, India

\* Corresponding author E-mail- [raja@iip.res.in](mailto:raja@iip.res.in) & Tel: +91 135 2525917

## **S1. Catalyst characterization**

The crystal structure was confirmed by powder X-ray diffraction (XRD) on a Proto Advance X-ray diffractometer fitted with a Lynx eye high-speed strip detector in the  $2\theta$  range  $10\text{--}80^\circ$  using Cu  $K\alpha$  ( $\lambda = 0.154$  nm) as an incident beam.

The  $N_2$  adsorption-desorption isotherms were carried out on Micromeritics ASAP 2020 Surface Area & Porosity Analyzer. The sample was degassed under vacuum at  $200^\circ\text{C}$  for 4h before each analysis. The BET specific surface areas were determined from the adsorption data in the relative pressure ( $P/P_0$ ) range of  $0.06\text{--}0.2$ .

TEM images were collected using a JEOL JEM 2010 DM microscope, and samples were prepared by mounting an ethanol dispersion sample on a lacey carbon formvar coated Cu grid.

Scanning Electron Microscopy (SEM) micrographs were captured on an FEI Quanta 200 F, using a tungsten filament doped with lanthanum hexaboride ( $\text{LaB}_6$ ) as an X-ray source, fitted with an ETD detector with high vacuum mode, using secondary electrons and an acceleration tension of 10 or 30 kV. Samples were analyzed by spreading them on carbon tape. Energy-dispersive X-ray spectroscopy (EDX) was used in connection with SEM for the elemental analysis. SEM-elemental mapping was also collected with the spectrophotometer connected to the same instrument.

Temperature programmed reduction (TPR) and  $H_2$  chemisorption experiments were carried out in a Micromeritics, Auto Chem II 2920 instrument connected with a thermal conductivity detector (TCD). Prior to TPR, the catalysts were also heated at  $650^\circ\text{C}$  for 2 h in helium and then placed in 10%  $H_2/\text{Ar}$  with a flow rate of  $40\text{ ml min}^{-1}$  in the temperature range of  $40\text{--}1000^\circ\text{C}$  with an increment of  $10^\circ\text{C}/\text{min}$ .

The surface composition and the chemical state of the samples were carried out by X-ray photoelectron spectroscopy (XPS) (KAlpha, Thermo Scientific Corp.). The monochromatized X-ray Mg  $K\alpha$  radiation

(1253.6 eV) was used. The core levels were calibrated by reference to the first component of the C 1s core level peak set at 284.8 eV.

Thermogravimetric analysis (TGA) of the uncalcined catalyst was carried out in a Perkin Elmer TGA 8000 hyphenated with MS by heating 4 mg samples under airflow with a temperature ramp of 10 °C min<sup>-1</sup>.

Raman spectra were measured by using a HORIBA Scientific instrument equipped with OLYMPUS confocal microscope. A He/Ne power source laser with a wavelength of 633 nm was used for excitation and 2 mW laser power was used to record the spectra.

Electron paramagnetic resonance (EPR) spectra were collected at ambient temperature on a Bruker Biospin, Germany EMX micro A200-9.5/12/S/W to investigate the formation of radical species in the reaction system. The sample was placed in the capillary tube, and the experimental parameters of EPR were as follows: microwave frequency (9.38 GHz), microwave power (1.732 mW), modulation frequency (100 kHz), modulation amplitude (1.00 G) and sweep time (41 s).

Inductively coupled Plasma Atomic Emission Spectroscopic (ICP-AES) analysis was carried out by Inductively Coupled Plasma Atomic Emission Spectrometer; model: PS 3000 UV, (DRE), Leeman Labs, Inc, (USA).

### **DFT Method**

The spin-polarized DFT calculations were performed using effective core potentials to describe the electron-core interaction along with the double numerical plus polarization (DND) basis set. The Perdew and Wang (PW91) Generalized gradient approximation (GGA) exchange-correlation functional was used.<sup>1</sup> For the transition state calculations, the linear synchronous transit/quadratic synchronous transit (LST/QST) method was used.<sup>2</sup> Convergence criteria for the DFT calculations were kept at 0.0005 eV, 0.1 eV/Å, and 0.005 Å with respect to energy, force, and atom displacement, respectively. The k-points sampling of 1x2x1 was used for all the calculations, along with thermal smearing of 0.05 Ha. Cr<sub>2</sub>O<sub>3</sub><sup>NP</sup> and

FeCr<sub>2</sub>O<sub>4</sub> catalysts were modelled using Cr<sub>2</sub>O<sub>3</sub> (102) and FeCr<sub>2</sub>O<sub>4</sub> (102) surface slabs, as shown in Fig. S6. Both the Cr<sub>2</sub>O<sub>3</sub> (102) and FeCr<sub>2</sub>O<sub>4</sub> (102) surface slabs were six atomic layers thick, where the bottom three layers were fixed to their bulk positions, whereas the top three layers, along with the adsorbate species, were allowed to relax during the geometry optimizations. The activation barriers (E<sub>a</sub>) were calculated using the formula,

$$E_a = E^{TS} - E_{IS},$$

where E<sup>TS</sup> and E<sub>IS</sub> are the energy of the transition state and initial state, respectively.

The free energy of phenyl radical desorption was calculated using the formula,

$\Delta G_{des} = (E_{des-Ph} - E_{surface-Ph}) - T(S_{des-Ph} - S_{surface-Ph})$ , where E<sub>des-Ph</sub> is the energy of state where Ph radical is desorbed from the catalyst surface (Figure S7), E<sub>surface-Ph</sub> is the energy of state after the benzene C-H activation (Figure 12), whereas the S<sub>des-Ph</sub> and S<sub>surface-Ph</sub> are the entropy of above respective states. T is the reaction temperature.

| Entry     | Catalyst                               | Temp.<br>(°C) | Oxidant                           | Condition                                | C <sub>B</sub><br>(%) | S <sub>P</sub><br>(%) | Ref.             |
|-----------|----------------------------------------|---------------|-----------------------------------|------------------------------------------|-----------------------|-----------------------|------------------|
| 1         | Pd/CeO <sub>2</sub> /TiO <sub>2</sub>  | 80            | H <sub>2</sub> O <sub>2</sub>     | Heated under atmospheric pressure        | 73                    | 95                    | 3                |
| 2         | V/g-C <sub>3</sub> N <sub>4</sub>      | 70            | H <sub>2</sub> O <sub>2</sub>     | Heated under atmospheric pressure        | 24.6                  | 99.2                  | 4                |
| 3         | VO <sub>x</sub> /RGO                   | 50            | H <sub>2</sub> O <sub>2</sub>     | Heated under atmospheric pressure        | 17.4                  | 93.1                  | 5                |
| 4         | Fe-SBA-16                              | 65            | H <sub>2</sub> O <sub>2</sub>     | Heated under atmospheric pressure        | 12.1                  | 96.4                  | 6                |
| 5         | Fe-MFI                                 | 60            | H <sub>2</sub> O <sub>2</sub>     | Heated under atmospheric pressure        | 8.26                  | 92                    | 7                |
| 6         | Au-Pd/CFF@TiO <sub>2</sub>             | 80            | H <sub>2</sub> O <sub>2</sub>     | Heated under atmospheric pressure        | 46                    | 100                   | 8                |
| 7         | Cu/Ti/HZSM-5                           | 400           | O <sub>2</sub>                    | Tubular quartz fixed-bed micro-reactor   | 4.88                  | 88                    | 9                |
| 8         | Fe-CN/TS-1                             | 60            | H <sub>2</sub> O <sub>2</sub>     | Heated under photocatalytic condition    | 54.3                  | 18.4                  | 10               |
| 9         | Fe-CO-NH-C <sub>3</sub> N <sub>4</sub> | 60            | H <sub>2</sub> O <sub>2</sub>     | Heated under photocatalytic condition    | 53.3                  | 31.7                  | 11               |
| <b>10</b> | <b>FeCr<sub>2</sub>O<sub>4</sub></b>   | <b>70</b>     | <b>H<sub>2</sub>O<sub>2</sub></b> | <b>Heated under atmospheric pressure</b> | <b>71.3</b>           | <b>100</b>            | <b>This Work</b> |

**Table S1.** Literature Reports for Conversion of Benzene to Phenol

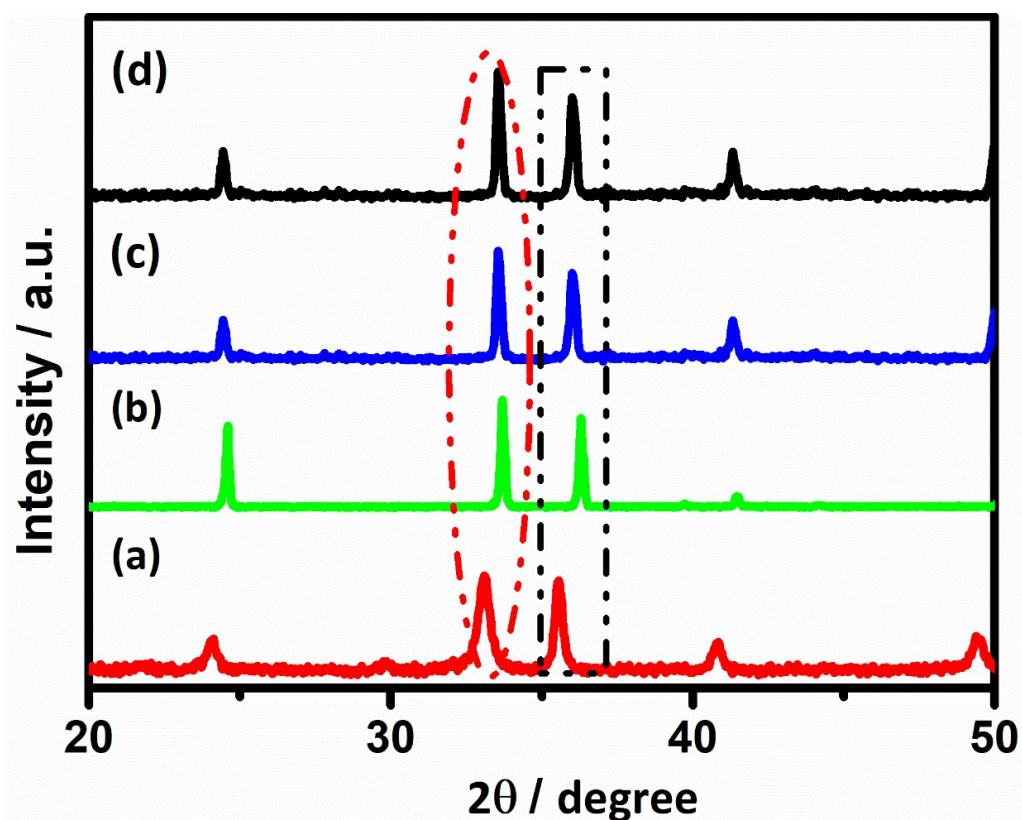

**Figure S1.** Powder XRD ( $20^\circ$ - $50^\circ$  region) of (a)  $\text{Fe}_2\text{O}_3$ , (b)  $\text{Cr}_2\text{O}_3$  (c)  $\text{FeCr}_2\text{O}_4$  and, (d) Spent  $\text{FeCr}_2\text{O}_4$  Samples

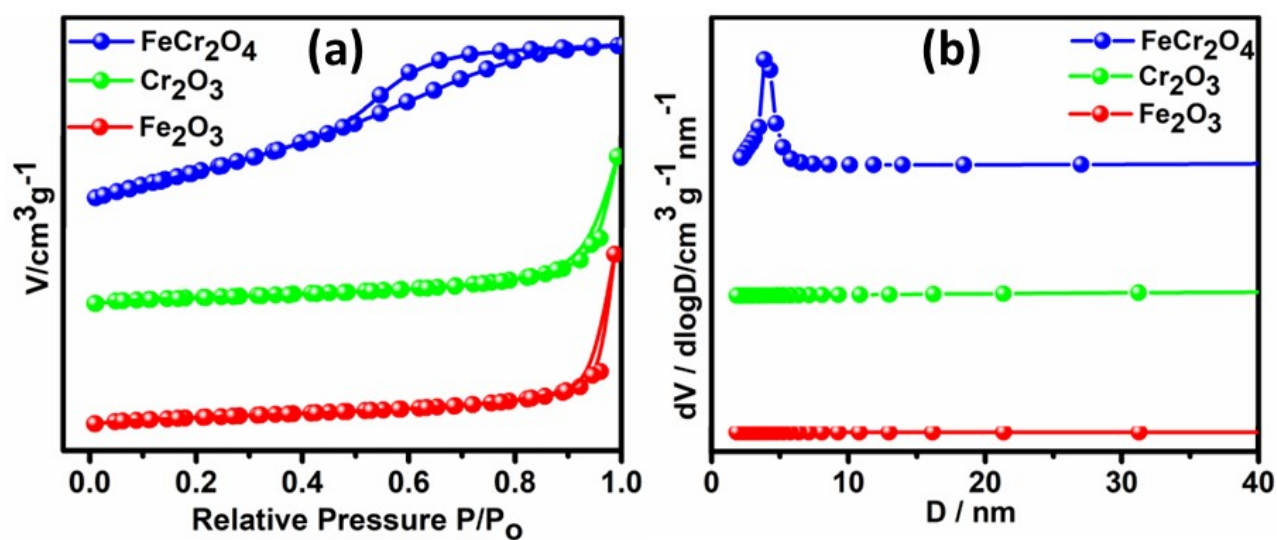

**Figure S2.** (a)  $\text{N}_2$  adsorption-desorption isotherms and (b) BJH pore size distributions

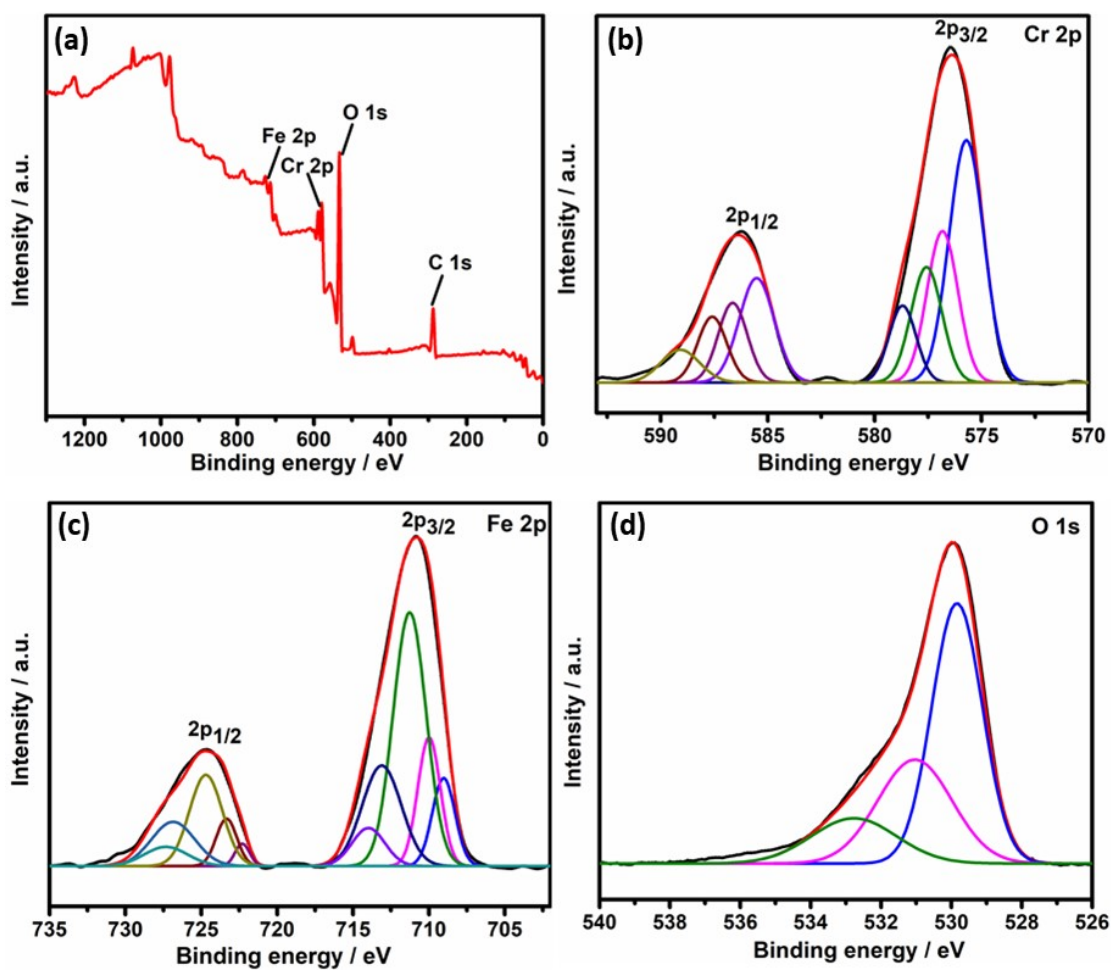

**Figure S3.** XPS survey (a), Cr 2p spectrum(b), Fe 2p spectrum(c) and O 1 s spectrum (d) of the spent  $\text{FeCr}_2\text{O}_4$ .

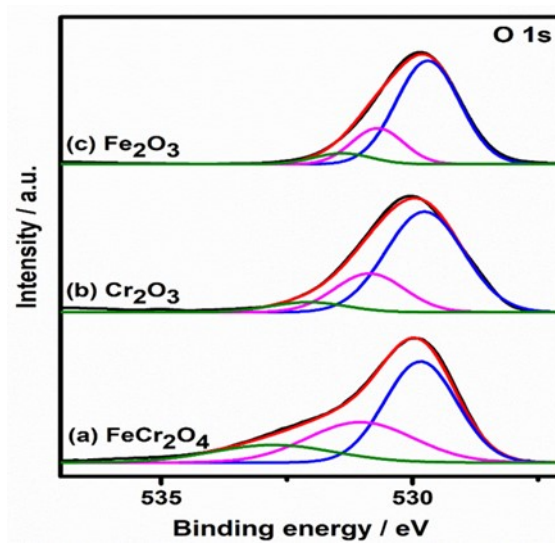

**Figure S4.** XPS of O 1s spectra of (a)  $\text{FeCr}_2\text{O}_4$ , (b)  $\text{Cr}_2\text{O}_3$  and (c)  $\text{Fe}_2\text{O}_3$ .

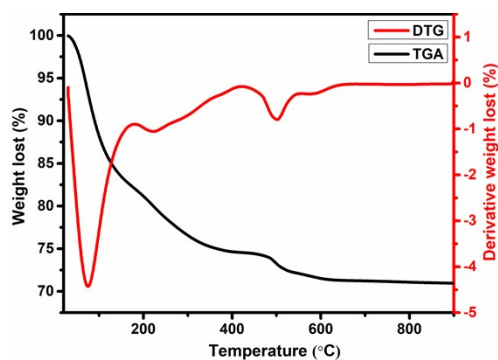

**Figure S5.** TGA-DTG study of the as-synthesized  $\text{FeCr}_2\text{O}_4$  that has not been calcined

**Table S2:** Effect of different solvents

| Entry | Solvent           | Conversion (%) | Phenol Selectivity (%) |
|-------|-------------------|----------------|------------------------|
| 1     | Acetonitrile      | 71.3           | 100                    |
| 2     | Dimethylformamide | 37             | 57                     |
| 3     | Acetone           | 25             | 40                     |
| 4     | Ethanol           | 26             | 42                     |

Reaction condition: 2.8 mmol benzene, 20 mg  $\text{FeCr}_2\text{O}_4$ , 5 ml acetonitrile, time 15 h, temperature 70 °C and 1:3 molar ratio of benzene/  $\text{H}_2\text{O}_2$ .

**Table S3.** The  $\text{O}_{\text{ads}}/\text{O}_{\text{latt}}$  molar ratio and benzene reaction rate of different catalyst.

| Samples                   | $\text{O}_{\text{ads}}/\text{O}_{\text{latt}}$ * molar ratio | Reaction rate ( $\text{mmol h}^{-1} \text{g}_{\text{cat}}^{-1}$ ) |
|---------------------------|--------------------------------------------------------------|-------------------------------------------------------------------|
| $\text{Fe}_2\text{O}_3$   | 0.28                                                         | 2.09                                                              |
| $\text{Cr}_2\text{O}_3$   | 0.34                                                         | 3.43                                                              |
| $\text{FeCr}_2\text{O}_4$ | 0.65                                                         | 6.61                                                              |

\* $\text{O}_{\text{latt}}$  referred to the surface lattice oxygen ( $\text{O}^{2-}$ ) and the  $\text{O}_{\text{ads}}$  referred to the surface adsorbed oxygen ( $\text{O}_2^-$ ,  $\text{O}_2^{2-}$  and  $\text{O}^-$ ) and this surface adsorbed oxygen was related to the oxygen vacancy. This molar ratio was determined from the deconvoluted O 1s spectra of catalyst.



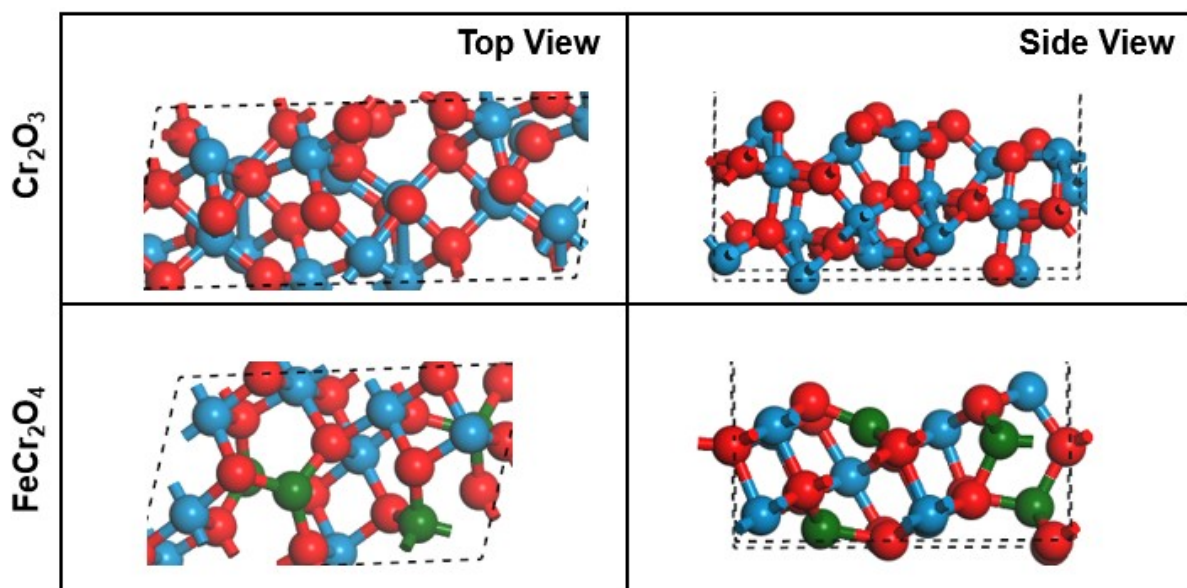

**Figure S6.** Top and Side view of surface  $\text{Cr}_2\text{O}_3$  (102) and  $\text{FeCr}_2\text{O}_4$  (102). Color code: Cr (blue), O (red), Fe (green) and H (white).

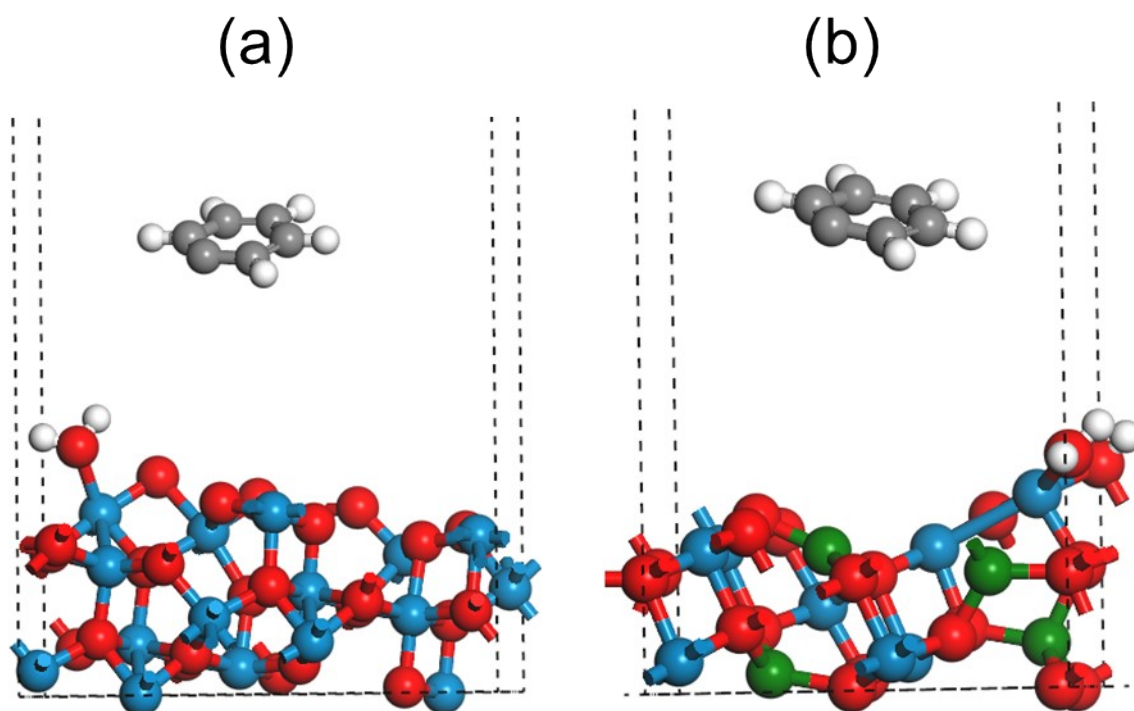

**Figure S7.** Surface geometry after  $\text{C}_6\text{H}_5$  radical desorption over (a)  $\text{Cr}_2\text{O}_3$  (102) and (b)  $\text{FeCr}_2\text{O}_4$  (102). Color code: Cr (blue), O (red), Fe (green) and H (white).

Kinetics of the reaction:

The temperature dependence of the rate of the hydroxylation reaction is shown in Figure 7(B). Kinetics studies of the  $\text{FeCr}_2\text{O}_4$  and  $\text{Cr}_2\text{O}_3$  catalyst at different temperatures follow pseudo-first-order reactions. It can be applied for further assessment of the catalytic performance, and; the data revealed that the obtained experimental data fit well with calculated ones (Figure S8). Therefore, the equation of kinetic for this reaction can be manifested as

$$-\ln \frac{A}{A_0} = kt$$
 where  $A_0$  and  $A$  are the initial and final benzene concentration at time  $t$ ; apparent rate constant is represented by  $k$ ;  $t$  is the reaction time, respectively.

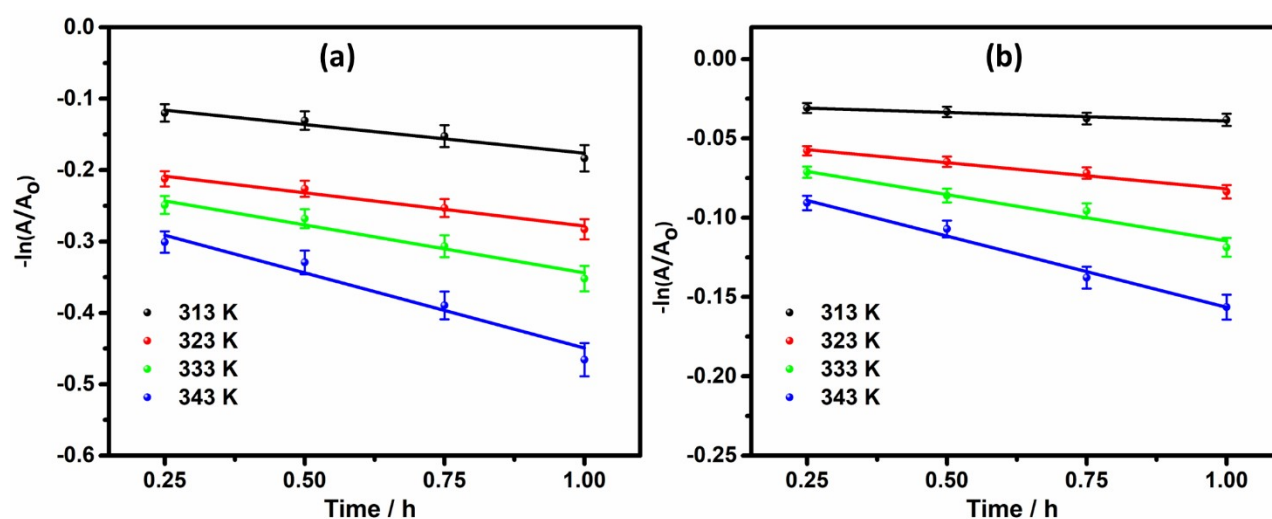

**Figure S8.**  $\ln(A/A_0)$  versus reaction time of the oxidation of benzene carried out at different temperatures over (a)  $\text{FeCr}_2\text{O}_4$  and (b)  $\text{Cr}_2\text{O}_3$  nanoparticles.

From the slopes of the line of best fit, the apparent rate constant values for the reactions were calculated at 40, 50, 60, and 70 °C.

Additionally, the apparent activation energy was calculated using the Arrhenius equation, and expressed as;

$$\ln k = \ln A - \frac{E_a}{RT}$$

Where the reaction temperature is T, the pre-exponential factor is A, and the molar gas constant is R. The slope of the line of best fit obtained by plotting  $\ln k$  vs  $1000/T$  (Figure S9) yielded the value of the activation energy ( $E_a$ ) of 114 and 127.4 kJ/mol for  $\text{FeCr}_2\text{O}_4$  and  $\text{Cr}_2\text{O}_3$ , respectively.

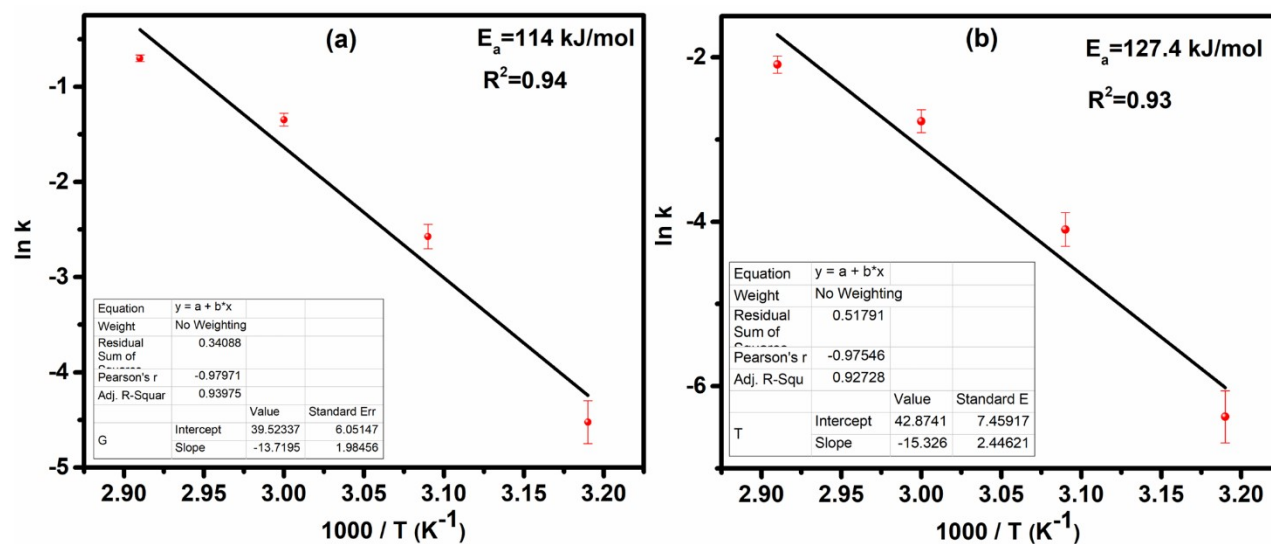

**Figure S9.** Arrhenius plot showing benzene oxidation reactions over (a)  $\text{FeCr}_2\text{O}_4$  and (b)  $\text{Cr}_2\text{O}_3$  nanoparticles at various temperatures.

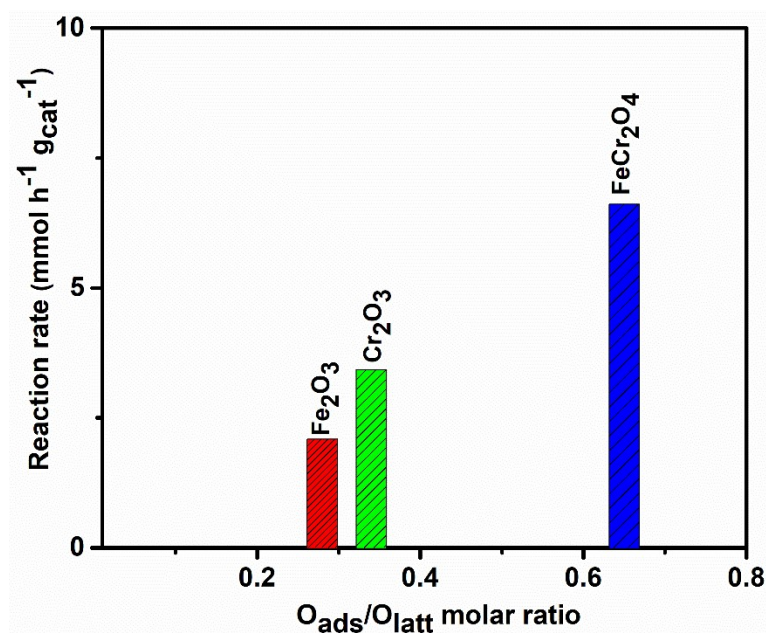

**Figure S10.** Correlation of  $O_{\text{ads}}/O_{\text{latt}}$  molar ratio versus Reaction rate over  $\text{FeCr}_2\text{O}_4$ ,  $\text{Cr}_2\text{O}_3$  and  $\text{Fe}_2\text{O}_3$  nanostructured catalyst.

## References

- 1 John P. Perdew and Yue Wang, *Physical Review B - Condensed Matter and Materials Physics B*, 1992, **45**, 244–248.
- 2 T. A. Halgren and W. N. Lipscomb, *Chem. Phys. Lett.*, 1977, **49**, 225–232.
- 3 X. Ma, R. Dang, Z. Liu, F. Yang, H. Li, T. Guo and J. Luo, *Chem. Eng. Sci.*, 2020, **211**, 115274.
- 4 C. Wang, L. Hu, M. Wang, Y. Ren, B. Yue and H. He, *Cuihua Xuebao/Chin. J. Catal.*, 2016, **37**, 2003–2008.
- 5 Y. Dong, X. Niu, W. Song, D. Wang, L. Chen, F. Yuan and Y. Zhu, *Catalysts*, 2016, **6**, 1–16.
- 6 M. Jourshabani, A. Badiei, Z. Shariatinia, N. Lashgari and G. Mohammadi Ziarani, *Ind. Eng. Chem. Res.*, 2016, **55**, 3900–3908.
- 7 P. Xiao, Y. Wang, J. N. Kondo and T. Yokoi, *Appl. Catal. A, Gen.*, 2019, **579**, 159–167.
- 8 S. M. Hosseini, M. Ghiaci, S. A. Kulinich, W. Wunderlich, B. H. Monjezi, Y. Ghorbani, H. S. Ghaziaskar and A. Javaheri Koupaei, *Appl. Surf. Sci.*, 2020, **506**, 144644.
- 9 A. Okemoto, Y. H. Tsukano, A. Utsunomiya, K. Taniya, Y. Ichihashi and S. Nishiyama, *J. Mol. Catal., A: Chem.*, 2016, **411**, 372–376.
- 10 X. Ye, Y. Cui, X. Qiu and X. Wang, *Appl. Catal. B*, 2014, **152–153**, 383–389.
- 11 X. Ye, Y. Zheng and X. Wang, *Chin. J. Chem.*, 2014, **32**, 498–506.
